# Supplementary material for: Clinical [18F]FSPG Positron Emission Tomography Imaging Reveals Heterogeneity in Tumor-Associated System xc− Activity
Source: MDPI journal article supplement (doi:10.3390/cancers16071437), 2024-04-08
Supplement: s1 [file s1]

## Supplementary data

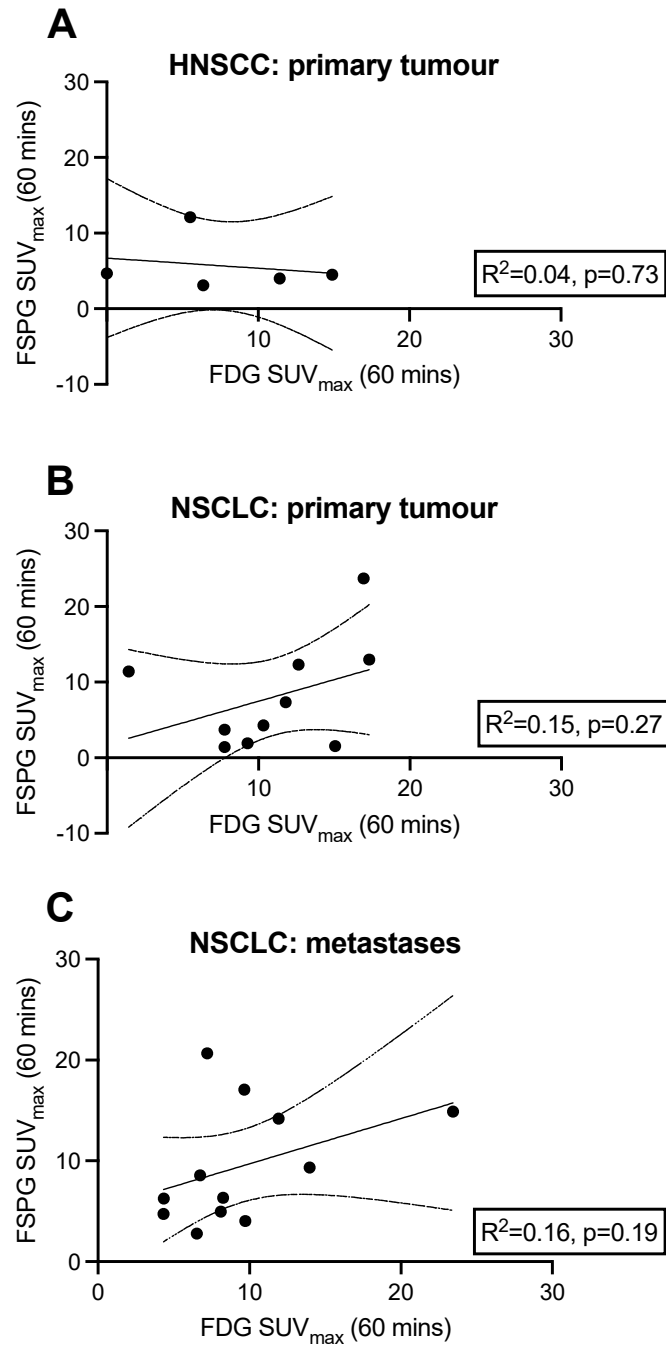

Supplementary Figure S1. Correlation of SUV<sub>max</sub> at 60 mins p.i. of [<sup>18</sup>F]FSPG vs. [<sup>18</sup>F]FDG, in HNSCC primary tumors (**A**), NSCLC primary tumors (**B**) and NSCLC metastatic lesions (**C**). Only one patient with HNSCC had a metastatic deposit. Lines of linear regression and 95% confidence levels (broken lines) are shown.

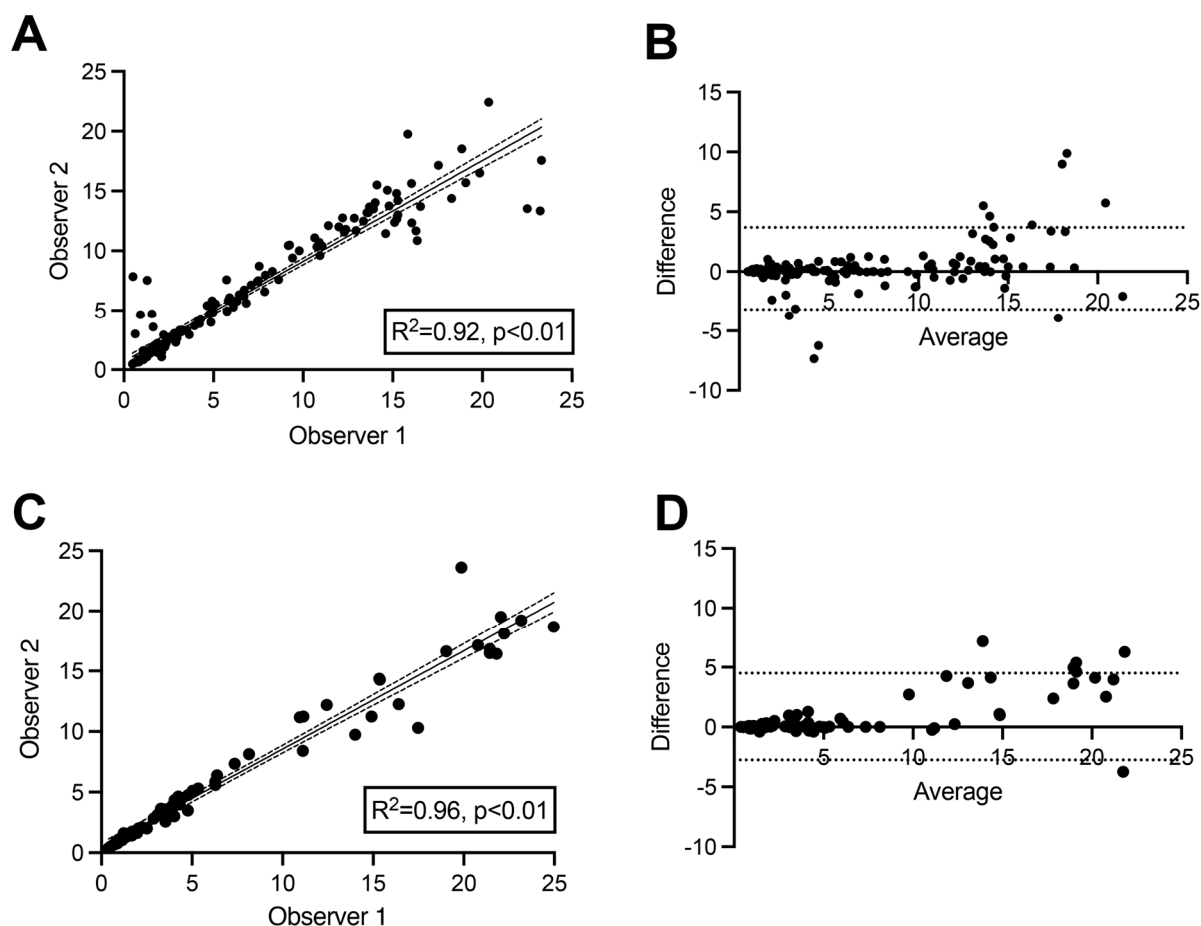

Supplementary Figure S2. Analysis of inter-observer readings (SUV<sub>max</sub> as measured by Observer 1 vs Observer 2) demonstrated high correlation. All time points and patients were included. **(A)** NSCLC inter-observer correlation. Lines of linear regression and 95% confidence levels (broken lines) are shown. **(B)** Bland-Altman plots (difference vs average) of NSCLC. **(C)** HSNCC inter-observer correlation. Lines of linear regression and 95% confidence levels (broken lines) are shown. **(D)** Bland-Altman plot for HSNCC.
